# Supplementary material for: YB-1 binds to CAUC motifs and stimulates exon inclusion by enhancing the recruitment of U2AF to weak polypyrimidine tracts
Source: PubMed Central journal article supplement — Nucleic Acids Res. 2012 Jun 21;40(17):8622–36. doi: 10.1093/nar/gks579 (PMC3458536; doi:10.1093/nar/gks579), 2012-06-21
Supplement: supp_gks579_nar-00227-a-2012-File009.pdf [file supp_gks579_nar-00227-a-2012-File009.pdf]

## Supplemental Material

### Oligonucleotides

|                          |                                                                              |
|--------------------------|------------------------------------------------------------------------------|
| DSX-ctrl-for             | 5'-TTAAGCTCTAGAGGCCCGACGTCGCATGC-3'                                          |
| DSX-ctrl-rev             | 5'-TTAAGCAAGCTTCTGCAGGCGGCCGCACAT-3'                                         |
| DSX-27-for               | 5'-CTAGAGCCACTCGTACCATCTGTGGGCCACTCGTACCATCTGTGGGCCACTCGTACCATC<br>TGTGGA-3' |
| DSX-27-rev               | 5'-AGCTTCCACAGATGGTACGAGTGGCCACAGATGGTACGAGTGGCCACAGATGGTAC<br>GAGTGGCT-3'   |
| DSX-CATCTG-for           | 5'-CTAGACATCTGCATCTGCATCTGCATCTGCATCTGCATCTGA-3'                             |
| DSX-CATCTG-rev           | 5'-AGCTTCAGATGCAGATGCAGATGCAGATGCAGATGCAGATGT-3'                             |
| DSX-CATCGC-for           | 5'-CTAGACATCGCCATCGCCATCGCCATCGCCATCGCCATCGCA-3'                             |
| DSX-CATCGC-rev           | 5'-AGCTTGCGATGGCGATGGCGATGGCGATGGCGATGGCGATGT-3'                             |
| DSX-GATCTG-for           | 5'-CTAGAGATCTGGATCTGGATCTGGATCTGGATCTGGATCTGA-3'                             |
| DSX-GATCTG-rev           | 5'-AGCTTCAGATCCAGATCCAGATCCAGATCCAGATCCAGATCT-3'                             |
| DSX-CATGTG-for           | 5'-CTAGACATGTGCATGTGCATGTGCATGTGCATGTGCATGTGA-3'                             |
| DSX-CATCTG-rev           | 5'-AGCTTCACATGCACATGCACATGCACATGCACATGCACATGT-3'                             |
| DSX-CTTCTG-for           | 5'-CTAGACTTCTGCTTCTGCTTCTGCTTCTGCTTCTGCTTCTGA-3'                             |
| DSX-CTTCTG-rev           | 5'-AGCTTCAGAAGCAGAAGCAGAAGCAGAAGCAGAAGCAGAAGT-3'                             |
| DSX-CGTCTG-for           | 5'-CTAGACGTCTGCGTCTGCGTCTGCGTCTGCGTCTGCGTCTGA-3'                             |
| DSX-CGTCTG-rev           | 5'-AGCTTCAGACGCAGACGCAGACGCAGACGCAGACGCAGACGT-3'                             |
| DSX-CACCTT-for           | 5'-CTAGACACCTTCACCTTCACCTTCACCTTCACCTTCACCTTA -3'                            |
| DSX-CACCTT-rev           | 5'-AGCTTAAGGTGAAGGTGAAGGTGAAGGTGAAGGTGAAGGTGT-3'                             |
| ACE sel-for              | 5'-CTAGACGAATTGGCTAGAGCACCAGTCACCGCTACGCGTCCACCAGTCACCGCCGCTAGCA-3'          |
| ACE sel-rev              | 5'-AGCTTGCTAGCGGCGGTGACTGGTGGACGCGTAGCGGTGACTGGTGCTAGCCAATTCGT-3'            |
| ACE sel mut-for          | 5'-CTAGACGAATTGGCTAGAGCTGGCGTGTGCTACGCGTCCGCGTCCGCGCTAGCA-3'                 |
| ACE sel mut-rev          | 5'-AGCTTGCTAGCGGCGACGACGCCAGGACGCGTAGCGACGACGCCAGCTCTAGCCAATTCGT-3'          |
| U2AF65-1                 | 5'-TTAAAGGATCCACCATGTCGGACTTCGACGAGT-3'                                      |
| U2AF65-2                 | 5'-TTAAATCTAGACTAAGCGTAATCTGGAACATCGTATGGGTACAGAAGTCCCGGCGGT-3'              |
| U2AF35-1                 | 5'-TTAAAAAGCTTACCATGGCGGAGTATCTGGCCT-3'                                      |
| U2AF35-2                 | 5'-TTACTCGAGTCAAGCGTAATCTGGAACATCGTATGGGTAGAATCGCCAGATCTTTCAC-3'             |
| U2AF35-3                 | 5'-TTAAAGGATCCCACCATGGCGGAGTATCTGGCCT-3'                                     |
| U2AF65- $\Delta$ RS-for  | 5'-TTAAAGGATCCACCATGCCTTTGACCAGAGGCGCTA-3'                                   |
| U2AF65- $\Delta$ RRM-rev | 5'-TTAAATCTAGATTAAGCGTAATCTGGAACATCGTATGGGTAGAGGCGCCGGCTTGTCT-3'             |
| U2AF65-RRM-for           | 5'-TTAAAGGATCCACCATGTACGTGGGCAACATCCCCT-3'                                   |
| U2AF35- $\Delta$ RS-rev  | 5'-TTAAACTCGAGTCAAGCGTAATCTGGAACATCGTATGGGTAATGGGCTTCAAATGCATGAAG-3'         |
| v4-794                   | 5'-TTAACTCGAGGTCATGATCCTTCTGTTAGGTGC-3'                                      |
| v5+479                   | 5'-TTAAGGATCCTTGCTCTAAAGAGTACAAGGGATG-3'                                     |
| $\Delta$ v4-for          | 5'-TTCAATCATCGGTTCTGCATATTTAATGAAAAG-3'                                      |
| $\Delta$ v4-rev          | 5'-ATGCAGAACCGATGATTGAAGCAATTAGAAAAA-3'                                      |
| v5-mut1-for              | 5'-CCCTCATTGTGGATGAGCATCATGAGGAAGAAG-3'                                      |
| v5-mut1-rev              | 5'-ATGCTCATCCACAATGAGGGGAGGGTGTGC-3'                                         |
| v5-mut1-1-for            | 5'-CCCTCATTCTGGATGAGCATCATGAGGAAGAAG-3'                                      |
| v5-mut1-1-rev            | 5'-ATGCTCATCCAGAATGAGGGGAGGGTGTGC-3'                                         |

|                |                                                                             |
|----------------|-----------------------------------------------------------------------------|
| v5-mut2-for    | 5'-ACCATGAGGTAGATGAGGAAGAAGAGACCCC-3'                                       |
| v5-mut2-rev    | 5'-TTCCTCATCTACCTCATGGTGAATGAGGGGA-3'                                       |
| v5-mut2-1-for  | 5'-ACCATGAGCTAGATGAGGAAGAAGAGACCCC-3'                                       |
| v5-mut2-1-rev  | 5'-TTCCTCATCTAGCTCATGGTGAATGAGGGGA-3'                                       |
| v5-mut3-for    | 5'-TTTAACCGTCGTCACAGCAGATGTAGACAGA-3'                                       |
| v5-mut3-rev    | 5'-GCTGTGACGACGGTTAAATACACTGTGACTTG-3'                                      |
| v5-mut4-for    | 5'-TTTAACCTTTTTCACAGCAGATGTAGACAGA-3'                                       |
| v5-mut4-rev    | 5'-GCTGTGAAAAAGGTTAAATACACTGTGACTTG-3'                                      |
| Y-shRNA-for    | 5'-GATCCGGTCATCGCAACGAAGGTTTTCAAGAGAAACCTTCGTTGCGATGACCTTTTTTG<br>CTAGCG-3' |
| Y-shRNA-rev    | 5'-AATTCGCTAGCAAAAAAGGTCATCGCAACGAAGGTTTCTCTTGAAAACCTTCGTTGCGA<br>TGACCG-3' |
| Luc-shRNA-for  | 5'-GATCCCGTACGCGGAATACTTCGATTCAAGAGATCGAAGTATCCGCGTACGTTTTTTG<br>TAGCG-3'   |
| Luc-shRNA-rev  | 5'-AATTCGCTAGCAAAAAACGTACGCGGAATACTTCGATCTCTGAATCGAAGTATCCGC<br>GTACGG-3'   |
| C5C6-junc for  | 5'-CAGAATCCCTGCTACCAGA-3'                                                   |
| C6-rev         | 5'-TCTGATTCAGATCCATGAGTGG-3'                                                |
| v3-for         | 5'-GTACGTCTTCAAATACCATCTC-3'                                                |
| v3-rev         | 5'-TGGTGCTGGAGATAAAATCTTC-3'                                                |
| v4-for         | 5'-ACCACACAAAACAGAACCAGG-3'                                                 |
| v4-rev         | 5'-CAGTCATCCTTGTGGTTGTC-3'                                                  |
| v5-for         | 5'-GTAGACAGAAATGGCACCCTG-3'                                                 |
| v5-rev         | 5'-TTGTGCTTGTAATGTGGG-3'                                                    |
| T7-DSX-in-for  | 5'-TAATACGACTCACTATAGGGGGCTGTGAAGTGAATTGTAT-3'                              |
| DSX-ex-rev     | 5'-CACATACGATTTAGGTGACAC-3'                                                 |
| T7-v5-70       | 5'-TAATACGACTCACTATAGGGAATGGAAGAATAGAATCATTAAAG-3'                          |
| v5+16          | 5'-CCATTCTGTGTACATCTGC-3'                                                   |
| pET-for        | 5'-TTGGTGGAAGCTCTCTACC-3'                                                   |
| pET-rev        | 5'-TCCACCCAGCTCCAGTTG-3'                                                    |
| YB-1 for       | 5'-GCAGACCGTAACCATTATAGACG-3'                                               |
| YB-1 rev       | 5'-TCTCCGCATGTAGTAAGGTGG-3'                                                 |
| beta actin for | 5'-AAATCGTGCGTGACATTAAGG-3'                                                 |
| beta actin rev | 5'-AGCACTGTGTTGGCGTACAG-3'                                                  |
